# Supplementary material
Source: publisher site journal article supplement (https://www.spandidos-publications.com/3487/downloadSupplementary)
Supplement: Supplementary file 1 [file downloadSupplementary]

Table SI. Weight and blood glucose levels of six db/db mice before and after treatment with 3-methyladenin (3-MA).

| Mice    | Weight, g<br>(before 3-MA) | Weight, g<br>(after 3-MA) | P-value | Blood glucose mg/dl,<br>(before 3-MA) | Blood glucose, mg/dl<br>(after 3-MA) | P-value |
|---------|----------------------------|---------------------------|---------|---------------------------------------|--------------------------------------|---------|
| No 1    | 48.9                       | 55.0                      |         | 21.9                                  | >33.3                                |         |
| No 2    | 49.0                       | 44.9                      |         | 32.5                                  | >33.3                                |         |
| No 3    | 55.3                       | 54.5                      |         | >33.3                                 | >33.3                                |         |
| No 4    | 62.3                       | 62.4                      |         | 22.6                                  | >33.3                                |         |
| No 5    | 42.5                       | 42.0                      |         | >33.3                                 | >33.3                                |         |
| No 6    | 66.1                       | 66.3                      |         | >33.3                                 | 29.9                                 |         |
| Average | 54.0                       | 54.18                     | P>0.05  | 29.48 <sup>a</sup>                    | 32.73a                               | P>0.05  |

3-MA, 3-methyladenin; db, diabetic; N/A, not applicable. <sup>a</sup>Exact blood glucose level values >33.3 mg/dl cannot be displayed by the glucometer, thus the mean and P-value were calculated by setting the values >33.3 mg/dl as 33.3 mg/dl.
